# Supplementary material for: Iron sensitizer converts light to electrons with 92% yield
Source: Springer Nature journal article supplement (doi:10.1038/nchem.2365), 2015-10-12
Supplement: 41557_2015_BFnchem2365_MOESM3_ESM.mol [file 41557_2015_BFnchem2365_MOESM3_ESM.mol]

  ChemDraw09241505373D

 57 64  0  0  0  0  0  0  0  0999 V2000
   -3.4730    1.7588   -0.0055 P   0  5  0  0  0  0  0  0  0  0  0  0
   -2.5312    1.2150   -0.0055 F   0  0  0  0  0  0  0  0  0  0  0  0
   -2.5312    2.3025   -0.0055 F   0  0  0  0  0  0  0  0  0  0  0  0
   -3.4730    2.8463   -0.0055 F   0  0  0  0  0  0  0  0  0  0  0  0
   -4.4149    2.3025   -0.0055 F   0  0  0  0  0  0  0  0  0  0  0  0
   -4.4149    1.2150   -0.0055 F   0  0  0  0  0  0  0  0  0  0  0  0
   -3.4730    0.6712   -0.0055 F   0  0  0  0  0  0  0  0  0  0  0  0
   -3.4777   -1.4891   -0.0055 P   0  5  0  0  0  0  0  0  0  0  0  0
   -2.5359   -2.0329   -0.0055 F   0  0  0  0  0  0  0  0  0  0  0  0
   -2.5359   -0.9454   -0.0055 F   0  0  0  0  0  0  0  0  0  0  0  0
   -3.4777   -0.4016   -0.0055 F   0  0  0  0  0  0  0  0  0  0  0  0
   -4.4196   -0.9454   -0.0055 F   0  0  0  0  0  0  0  0  0  0  0  0
   -4.4196   -2.0329   -0.0055 F   0  0  0  0  0  0  0  0  0  0  0  0
   -3.4777   -2.5767   -0.0055 F   0  0  0  0  0  0  0  0  0  0  0  0
    0.9505    3.8144   -0.0055 C   0  0  0  0  0  0  0  0  0  0  0  0
    0.9522    2.9872   -0.0055 C   0  0  0  0  0  0  0  0  0  0  0  0
    1.6638    2.5738   -0.0055 N   0  0  0  0  0  0  0  0  0  0  0  0
    2.3743    2.9872   -0.0055 C   0  0  0  0  0  0  0  0  0  0  0  0
    2.3726    3.8144   -0.0055 C   0  0  0  0  0  0  0  0  0  0  0  0
    1.6610    4.2277   -0.0055 C   0  0  0  0  0  0  0  0  0  0  0  0
    3.0824    2.5762   -0.0055 N   0  0  0  0  0  0  0  0  0  0  0  0
    0.2441    2.5756   -0.0055 N   0  0  0  0  0  0  0  0  0  0  0  0
   -0.5070    2.9110   -0.0055 C   0  0  0  0  0  0  0  0  0  0  0  0
   -1.0554    2.2968   -0.0055 C   0  0  0  0  0  0  0  0  0  0  0  0
   -0.6438    1.5806   -0.0055 N   0  0  0  0  0  0  0  0  0  0  0  0
    0.1594    1.7529   -0.0055 C   0  0  0  0  0  0  0  0  0  0  0  0
    3.1706    1.7529   -0.0055 C   0  0  0  0  0  0  0  0  0  0  0  0
    3.9738    1.5806   -0.0055 N   0  0  0  0  0  0  0  0  0  0  0  0
    4.3837    2.2968   -0.0055 C   0  0  0  0  0  0  0  0  0  0  0  0
    3.8329    2.9110   -0.0055 C   0  0  0  0  0  0  0  0  0  0  0  0
   -0.9753    0.8278   -0.0055 C   0  0  0  0  0  0  0  0  0  0  0  0
    4.3081    0.8278   -0.0055 C   0  0  0  0  0  0  0  0  0  0  0  0
    1.6610    5.0493   -0.0055 C   0  0  0  0  0  0  0  0  0  0  0  0
    0.9494    5.4601   -0.0055 O   0  0  0  0  0  0  0  0  0  0  0  0
    2.3725    5.4601   -0.0055 O   0  0  0  0  0  0  0  0  0  0  0  0
    0.9864   -3.8144    0.0055 C   0  0  0  0  0  0  0  0  0  0  0  0
    0.9882   -2.9872    0.0055 C   0  0  0  0  0  0  0  0  0  0  0  0
    1.6997   -2.5738    0.0055 N   0  0  0  0  0  0  0  0  0  0  0  0
    2.4102   -2.9872    0.0055 C   0  0  0  0  0  0  0  0  0  0  0  0
    2.4085   -3.8144    0.0055 C   0  0  0  0  0  0  0  0  0  0  0  0
    1.6969   -4.2277    0.0055 C   0  0  0  0  0  0  0  0  0  0  0  0
    3.1183   -2.5762    0.0055 N   0  0  0  0  0  0  0  0  0  0  0  0
    0.2800   -2.5756    0.0055 N   0  0  0  0  0  0  0  0  0  0  0  0
   -0.4711   -2.9110    0.0055 C   0  0  0  0  0  0  0  0  0  0  0  0
   -1.0195   -2.2968    0.0055 C   0  0  0  0  0  0  0  0  0  0  0  0
   -0.6079   -1.5806    0.0055 N   0  0  0  0  0  0  0  0  0  0  0  0
    0.1953   -1.7529    0.0055 C   0  0  0  0  0  0  0  0  0  0  0  0
    3.2065   -1.7529    0.0055 C   0  0  0  0  0  0  0  0  0  0  0  0
    4.0097   -1.5806    0.0055 N   0  0  0  0  0  0  0  0  0  0  0  0
    4.4196   -2.2968    0.0055 C   0  0  0  0  0  0  0  0  0  0  0  0
    3.8689   -2.9110    0.0055 C   0  0  0  0  0  0  0  0  0  0  0  0
   -0.9394   -0.8278    0.0055 C   0  0  0  0  0  0  0  0  0  0  0  0
    4.3440   -0.8278    0.0055 C   0  0  0  0  0  0  0  0  0  0  0  0
    1.6969   -5.0493    0.0055 C   0  0  0  0  0  0  0  0  0  0  0  0
    0.9854   -5.4601    0.0055 O   0  0  0  0  0  0  0  0  0  0  0  0
    2.4084   -5.4601    0.0055 O   0  0  0  0  0  0  0  0  0  0  0  0
    1.6698    0.1112   -0.0055 Fe  0  2  0  0  0  0  0  0  0  0  0  0
  1  2  1  0      
  1  3  1  0      
  1  4  1  0      
  1  5  1  0      
  1  6  1  0      
  1  7  1  0      
  8  9  1  0      
  8 10  1  0      
  8 11  1  0      
  8 12  1  0      
  8 13  1  0      
  8 14  1  0      
 15 16  2  0      
 16 17  1  0      
 17 18  2  0      
 18 19  1  0      
 19 20  2  0      
 20 15  1  0      
 20 33  1  0      
 18 21  1  0      
 16 22  1  0      
 22 23  1  0      
 23 24  2  0      
 24 25  1  0      
 25 26  1  0      
 26 22  1  0      
 21 27  1  0      
 27 28  1  0      
 28 29  1  0      
 29 30  2  0      
 30 21  1  0      
 25 31  1  0      
 28 32  1  0      
 33 34  2  0      
 33 35  1  0      
 36 37  2  0      
 37 38  1  0      
 38 39  2  0      
 39 40  1  0      
 40 41  2  0      
 41 36  1  0      
 41 54  1  0      
 39 42  1  0      
 37 43  1  0      
 43 44  1  0      
 44 45  2  0      
 45 46  1  0      
 46 47  1  0      
 47 43  1  0      
 42 48  1  0      
 48 49  1  0      
 49 50  1  0      
 50 51  2  0      
 51 42  1  0      
 46 52  1  0      
 49 53  1  0      
 54 55  2  0      
 54 56  1  0      
 26 57  2  0      
 27 57  2  0      
 47 57  2  0      
 48 57  2  0      
 17 57  1  0      
 38 57  1  0      
M  CHG  3   1  -1   8  -1  57   2
M  END
